# Supplementary material for: Amino Acid Permeases and Virulence in Cryptococcus neoformans
Source: PubMed Central journal article supplement (PMC5047642; doi:10.1371/journal.pone.0163919), 2016-10-03
Supplement: pone.0163919.s001.pdf [file pone.0163919.s001.pdf]

(A)

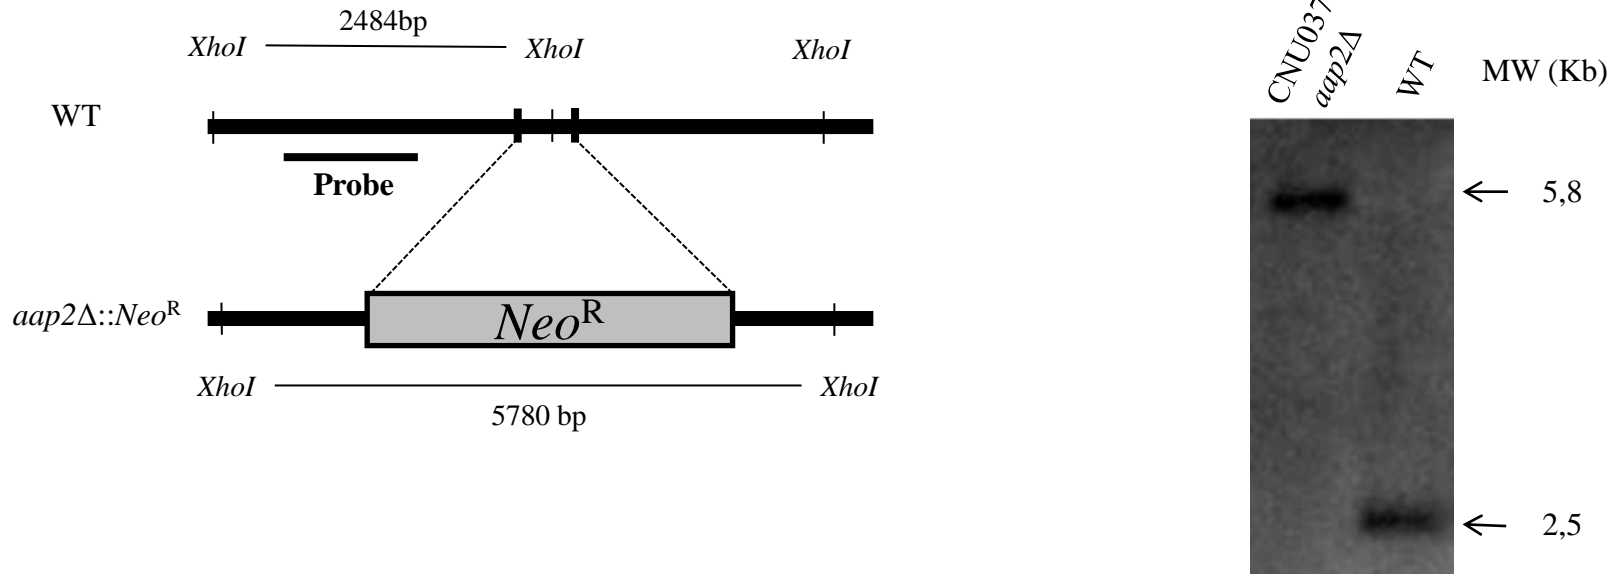

**S1 Fig.** Schematic representation of wild type and mutant loci and *southern blot* analysis of single and double mutants. (A) *aap2Δ*; (B) *aap4Δ*; (C) *aap5Δ*; (D) *aap4Δ/aap5Δ*; (E) *mup1Δ*; (F) *mup3Δ* and (G) *mup1Δ/mup3Δ*. MW = molecular weight; Kb = kilobase pairs

**(B)**

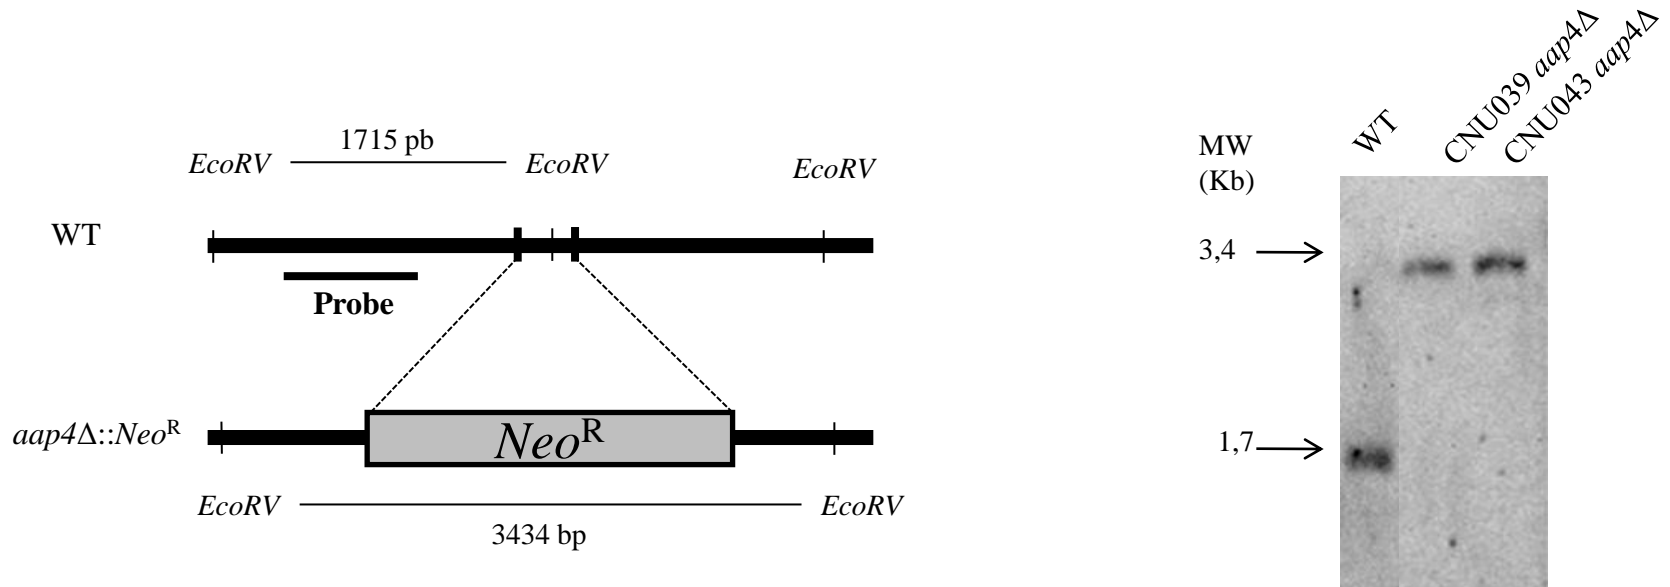

**Supplementary Figure 1.** Southern blot analysis of *aap4Δ::Neo<sup>R</sup>*. **(C)** Schematic representation of *AAP4* locus with *EcoRV* sites. **(D)** Restriction pattern of *AAP4* locus in the wild type (WT) H99 and mutant strains (CNU039 and 043). MW = molecular weight; Kb = kilobase pairs

(C)

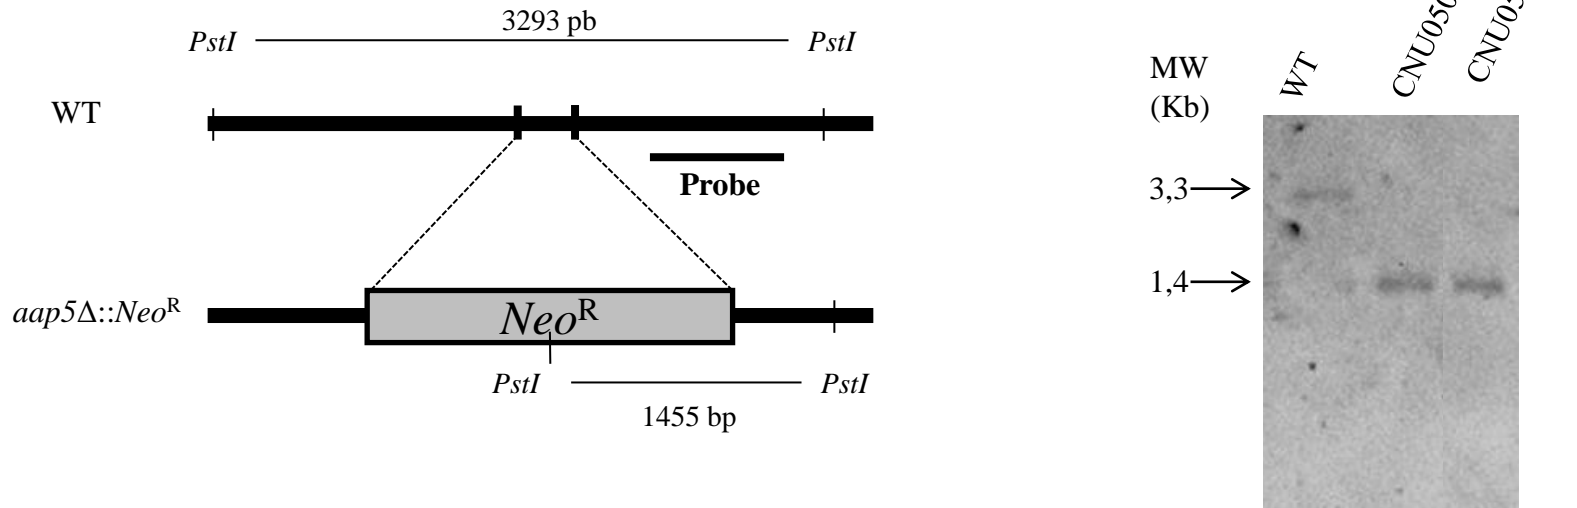

**Supplementary Figure 1.** Southern blot analysis of *aap5Δ::Neo<sup>R</sup>*. (E) Schematic representation of *AAP5* locus with *PstI* sites. (F) Restriction pattern of *AAP5* locus in the wild type (WT) H99 and mutant strains (CNU050 and 052). MW = molecular weight; Kb = kilobase pairs

**(D)**

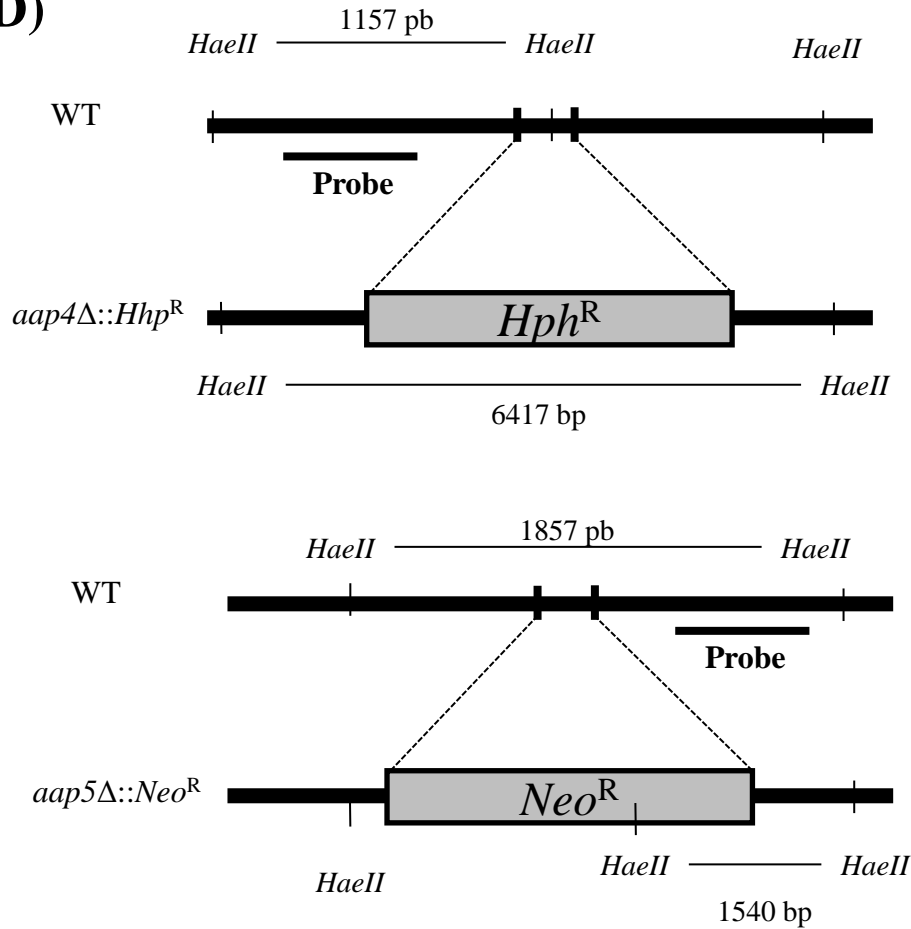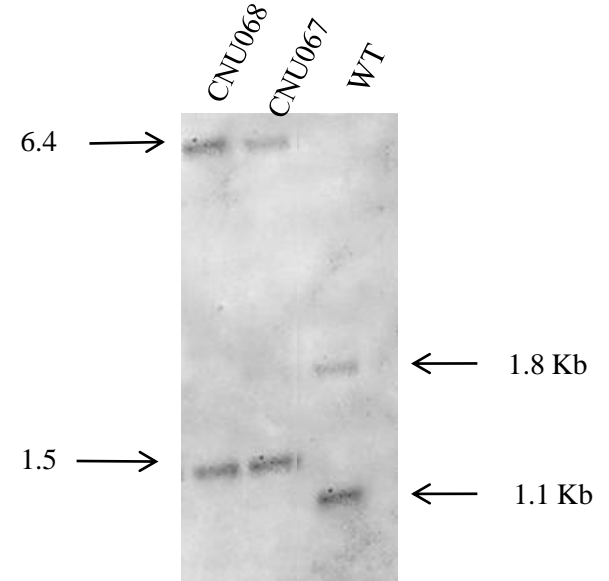

**Supplementary Figure 1.** Southern blot analysis of *aap4Δ::Hhp<sup>R</sup>/aap5Δ::Neo<sup>R</sup>*. (G) Schematic representation of *AAP4* and *AAP5* locus with *HaeII* sites. (H) Restriction pattern of *AAP4* and *AAP5* locus in the wild type (WT) H99 and mutant strains (CNU067 and 068). MW = molecular weight; Kb = kilobase pairs

**(E)**

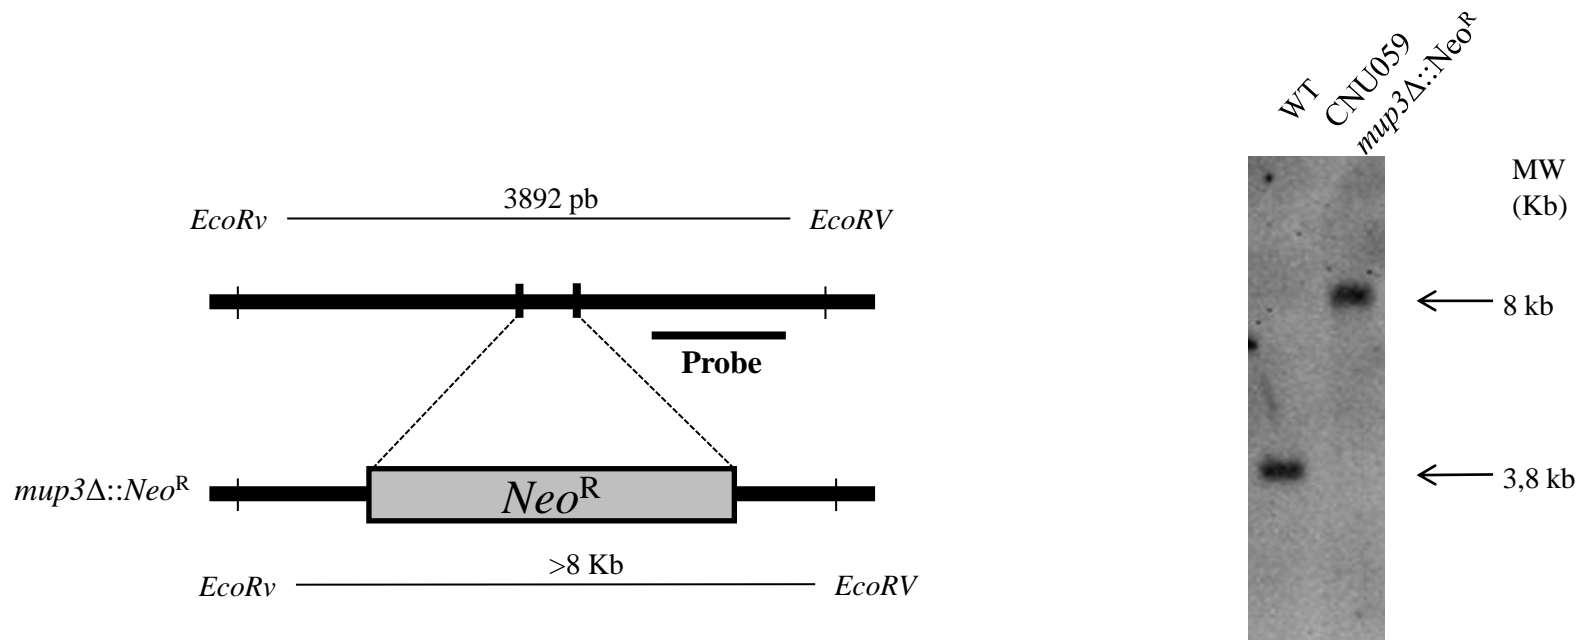

**Supplementary Figure 1. Southern blot analysis of *mup3Δ::Neo<sup>R</sup>*. (E) Schematic representation of *MUP3* locus with *EcoRV* sites. (F) Restriction pattern of *MUP3* locus in the wild type (WT) H99 and mutant strain (CNU0059). MW = molecular weight; Kb = kilobase pairs**

**(F)**

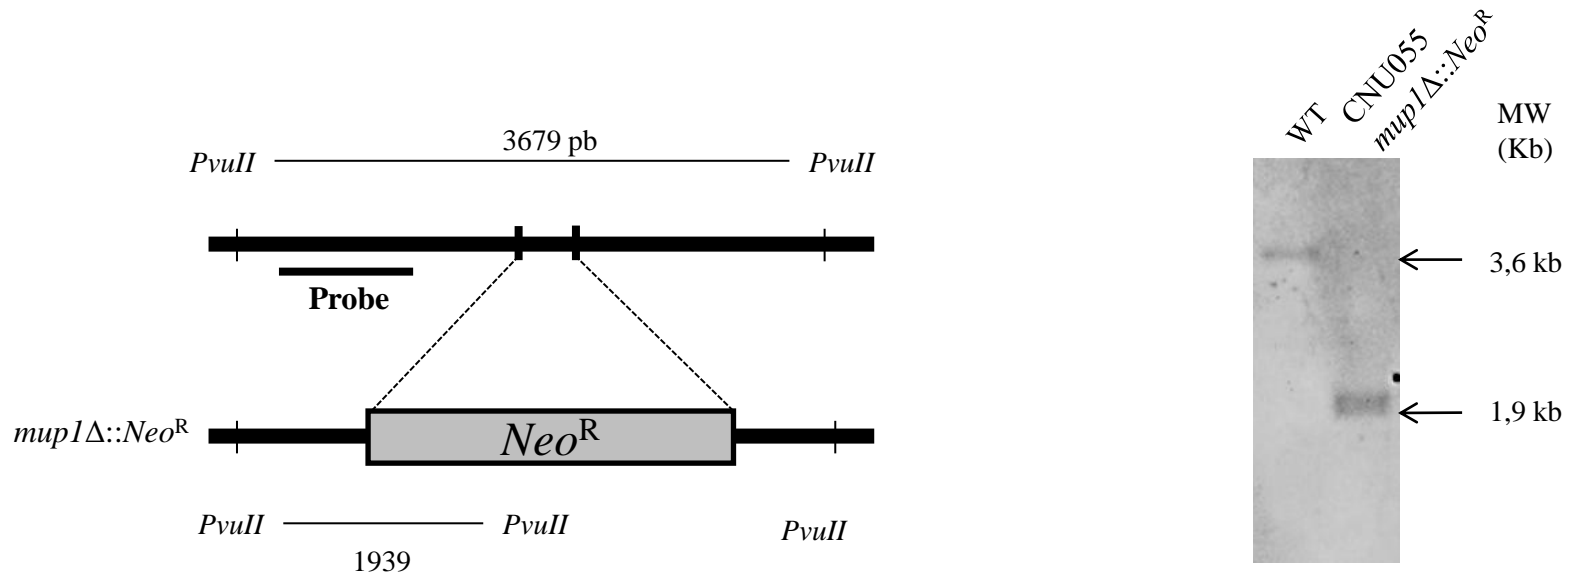

**Supplementary Figure 1.** Southern blot analysis of *mup1Δ::Neo<sup>R</sup>*. **(E)** Schematic representation of *MUP1* locus with *PvuII* sites. **(F)** Restriction pattern of *MUP1* locus in the wild type (WT) H99 and mutant strain (CNU0055). MW = molecular weight; Kb = kilobase pairs

(G)

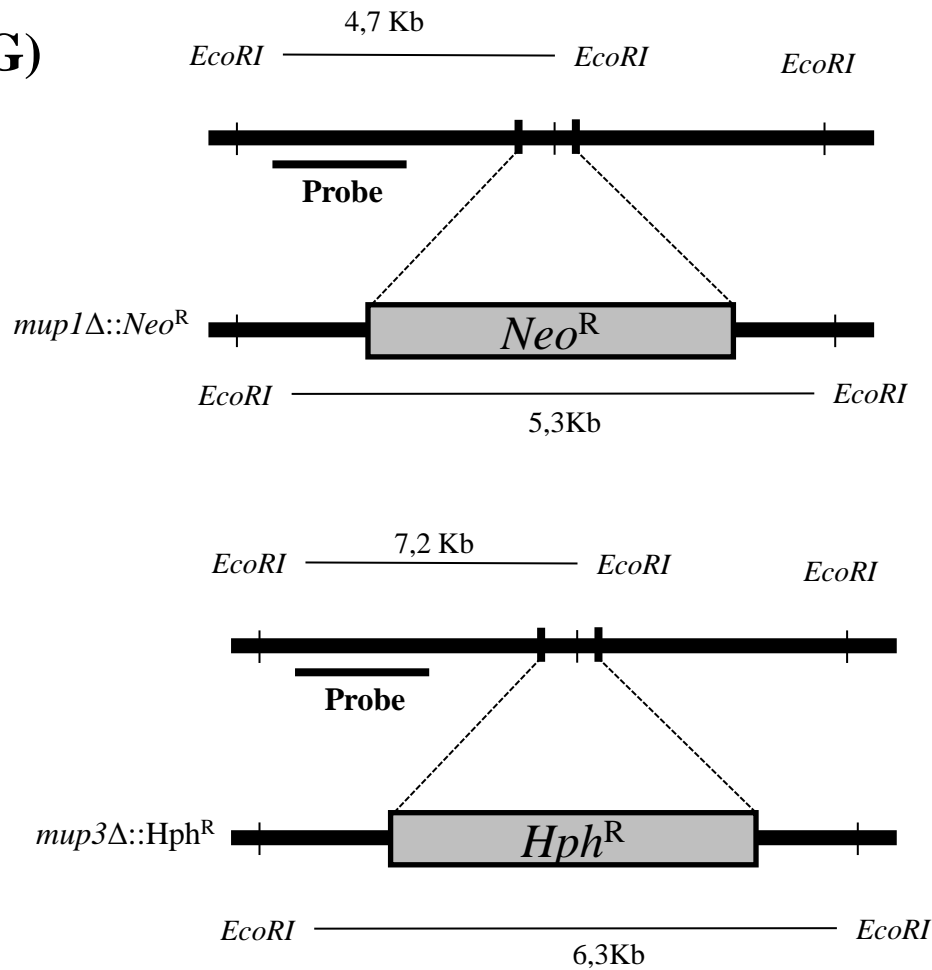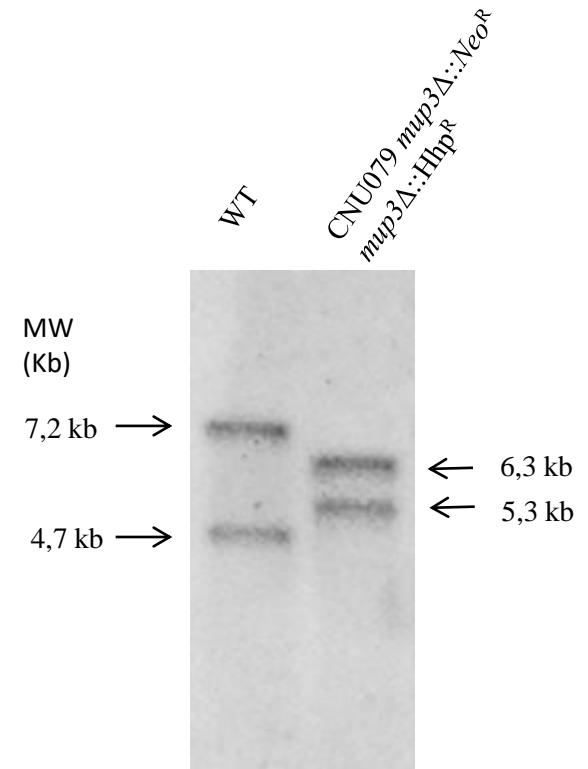

**Supplementary Figure 1.** Southern blot analysis of *mup1*Δ::Neo<sup>R</sup>; *mup3*Δ::Hph<sup>R</sup>. (M) Schematic representation of *MUP1* and *MUP3* locus with *EcoRI* sites. (N) Restriction pattern of *MUP1* and *MUP3* locus in the wild type (WT) H99 and mutant strain (CNU079). MW = molecular weight; Kb = kilobase pairs
